# Supplementary material for: In silico Design of Novel HIV-1 NNRTIs Based on Combined Modeling Studies of Dihydrofuro[3,4-d]pyrimidines
Source: PubMed Central journal article supplement (PMC7105726; doi:10.3389/fchem.2020.00164), 2020-03-24
Supplement: Presentation_1.pdf [file Presentation_1.pdf]

## *Supplementary Material*

### ***In silico* design of novel HIV-1 NNRTIs based on combined modeling studies of dihydrofuro[3,4-d]pyrimidines**

Yanming Chen<sup>1</sup>, Yafeng Tian<sup>1</sup>, Ya Gao<sup>1</sup>, Fengshou Wu<sup>1</sup>, Xiaogang Luo<sup>1,2</sup>,  
Xiulian Ju<sup>1</sup>, Genyan Liu<sup>1,\*</sup>

<sup>1</sup> *Key Laboratory for Green Chemical Process of Ministry of Education, Hubei Key Laboratory of Novel Reactor and Green Chemical Technology, School of Chemical Engineering and Pharmacy, Wuhan Institute of Technology, Wuhan 430205, P. R. China*

<sup>2</sup> *School of Materials Science and Engineering, Zhengzhou University, No.100 Science Avenue, Zhengzhou City, 450001, Henan Province, P. R. China*

\*Correspondence: Genyan Liu, School of Chemical Engineering and Pharmacy, Wuhan Institute of Technology, Wuhan 430205, Hubei, P. R. China

Tel.: +86-136 6723 5670

*Email Addresses:* liugenyan@yahoo.com; liugenyan@wit.edu.cn (G. Liu)

**Table S1.** Classical statistical parameters of the CoMFA and CoMSIA models.

|        | Model            | q <sup>2</sup> | ONC       | R <sup>2</sup> | SEE          | F              | r <sub>pred</sub> <sup>2</sup> | Field contributions (%) |             |           |             |             |
|--------|------------------|----------------|-----------|----------------|--------------|----------------|--------------------------------|-------------------------|-------------|-----------|-------------|-------------|
|        |                  |                |           |                |              |                |                                | S                       | E           | A         | D           | H           |
| CoMFA  | S+E              | <b>0.647</b>   | <b>8</b>  | <b>0.970</b>   | <b>0.094</b> | <b>121.235</b> | <b>0.751</b>                   | <b>42.9</b>             | <b>57.1</b> |           |             |             |
|        | <b>S+E+A+D+H</b> | <b>0.735</b>   | <b>10</b> | <b>0.982</b>   | <b>0.076</b> | <b>151.015</b> | <b>0.672</b>                   | <b>4.1</b>              | <b>19.7</b> | <b>29</b> | <b>33.4</b> | <b>13.8</b> |
|        | A+H              | 0.562          | 6         | 0.919          | 0.149        | 60.902         | 0.542                          |                         |             | 60.8      |             | 39.2        |
|        | S+H              | 0.593          | 7         | 0.916          | 0.154        | 48.294         | 0.432                          | 22.1                    |             |           |             | 77.9        |
|        | A+D+H            | 0.684          | 11        | 0.982          | 0.076        | 136.118        | 0.346                          |                         |             | 34.8      | 44.1        | 21.1        |
|        | E+D+H            | 0.711          | 8         | 0.947          | 0.125        | 66.611         | 0.389                          |                         | 34.2        |           | 21.3        | 44.5        |
| CoMSIA | E+A+H            | 0.605          | 5         | 0.905          | 0.159        | 63.062         | 0.538                          |                         | 35.2        | 42.3      |             | 22.5        |
|        | S+A+H            | 0.632          | 12        | 0.974          | 0.094        | 80.698         | 0.657                          | 12.7                    |             | 48.9      |             | 38.4        |
|        | E+A+D+H          | 0.723          | 11        | 0.983          | 0.074        | 143.976        | 0.601                          |                         | 20.9        | 29.4      | 35.1        | 14.6        |
|        | S+A+D+H          | 0.685          | 11        | 0.983          | 0.074        | 144.841        | 0.379                          | 5.1                     |             | 34.1      | 41.5        | 19.3        |
|        | S+E+D+H          | 0.705          | 8         | 0.947          | 0.125        | 66.748         | 0.453                          | 4.9                     | 32.1        |           | 43.2        | 19.8        |
|        | S+E+A+H          | 0.634          | 5         | 0.913          | 0.152        | 69.200         | 0.616                          | 46.7                    | 32.4        | 39.8      |             | 21.2        |

**Table S2.** Statistical parameters of the pharmacophore models.

| Name             | SPECIFITY    | N_HITS   | FEATS    | PARETO   | ENERGY       | STERICS        | HBOND         | MOL_QRY      |
|------------------|--------------|----------|----------|----------|--------------|----------------|---------------|--------------|
| Model_01         | 5.346        | 7        | 10       | 0        | 268.32       | 5458.10        | 601.20        | 156.74       |
| Model_02         | 2.914        | 10       | 10       | 0        | 19056660     | 5442.80        | 700.90        | 186.64       |
| Model_03         | 5.785        | 10       | 8        | 0        | 655334.44    | 5379.40        | 636.50        | 207.01       |
| Model_04         | 4.231        | 10       | 9        | 0        | 1814494.5    | 5292.30        | 667.70        | 142.97       |
| Model_05         | 5.334        | 10       | 10       | 0        | 2932319      | 5707.10        | 602.80        | 129.35       |
| Model_06         | 4.423        | 7        | 8        | 0        | 247.97       | 4924.60        | 595.30        | 124.69       |
| Model_07         | 5.302        | 7        | 9        | 0        | 1831234.8    | 5550.00        | 612.90        | 99.63        |
| Model_08         | 5.413        | 7        | 9        | 0        | 332.48       | 4682.30        | 602.30        | 156.71       |
| Model_09         | 5.400        | 10       | 9        | 0        | 261107.9     | 4982.00        | 656.90        | 93.39        |
| Model_10         | 4.550        | 9        | 8        | 0        | 10088992     | 5325.90        | 667.20        | 104.94       |
| Model_11         | 4.693        | 10       | 8        | 0        | 457813.1     | 5434.80        | 617.10        | 92.35        |
| Model_12         | 5.443        | 7        | 9        | 0        | 1421060      | 5237.60        | 676.30        | 84.12        |
| Model_13         | 5.576        | 10       | 8        | 0        | 18232012     | 5511.30        | 659.90        | 81.53        |
| Model_14         | 5.658        | 7        | 8        | 0        | 5499636      | 5733.70        | 653.50        | 76.31        |
| Model_15         | 4.537        | 7        | 9        | 0        | 355631.6     | 4983.10        | 619.90        | 92.48        |
| Model_16         | 4.498        | 5        | 10       | 0        | 1718275.7    | 5461.00        | 558.50        | 121.01       |
| Model_17         | 5.673        | 10       | 8        | 0        | 1843.74      | 5338.30        | 608.50        | 65.64        |
| Model_18         | 4.498        | 7        | 8        | 0        | 496847.31    | 5149.30        | 646.80        | 66.92        |
| Model_19         | 4.554        | 8        | 8        | 0        | 37.30        | 4663.60        | 526.90        | 85.87        |
| <b>Model_20*</b> | <b>5.746</b> | <b>9</b> | <b>8</b> | <b>0</b> | <b>62.29</b> | <b>4521.80</b> | <b>568.20</b> | <b>70.88</b> |

**Table S3.** Hydrophobic, hydrogen bond, and  $\pi$ - $\pi$  stacking interactions of the screened hits as potential HIV-1 NNRTI in the RT protein (PDB ID:6C0J).

| <b>Compounds</b> | <b>Hydrophobic</b>                        | <b>Hydrogen bonds</b>                                                   | <b><math>\pi</math>-<math>\pi</math></b> |
|------------------|-------------------------------------------|-------------------------------------------------------------------------|------------------------------------------|
| ZINC_57841658    | Val106, Tyr181, Tyr188,<br>Phe227, Trp229 | Lys101 with O of NH<br>Lys101 with OH of N<br>Lys101 with NH of C=O     | Tyr188, Tyr181,<br>Phe227, Trp229        |
| ZINC_60381334    | Val106, Tyr181, Tyr188,<br>Phe227, Trp229 | Lys101 with O of NH<br>Lys101 with OH of N                              | Tyr188, Tyr181,<br>Phe227, Trp229        |
| ZINC_63070905    | Val106, Tyr181, Tyr188,<br>Phe227, Trp229 | Lys101 with O of NH<br>Glu138 with OH of OH                             | Trp229                                   |
| ZINC_69532225    | Val106, Tyr181, Tyr188,<br>Phe227, Trp229 | Lys101 with O of NH<br>Lys101 with OH of N<br>Lys101 with NH of C=O     | Tyr188, Tyr181,<br>Phe227, Trp229        |
| ZINC_71894576    | Val106, Tyr181, Tyr188,<br>Phe227, Trp229 | Lys101 with O of NH<br>Lys101 with OH of N<br>Lys101 with NH of C=O     | Tyr188, Tyr181,<br>Phe227                |
| ZINC_73709240    | Val106, Tyr181, Tyr188,<br>Phe227, Trp229 | Ile180 with OH of C=O<br>Ile180 with NH of C=O<br>Glu138 with OH of C=O | Tyr188, Tyr181,<br>Phe227, Trp229        |
| ZINC_89506228    | Val106, Tyr181, Tyr188,<br>Phe227, Trp229 | Lys101 with O of NH<br>Lys101 with OH of N<br>Lys101 with NH of C=O     | Tyr188, Tyr181,<br>Phe227, Trp229        |
| ZINC_91409938    | Val106, Tyr181, Tyr188,<br>Phe227, Trp229 | A network between<br>Pro236 and Lys103 by a<br>water molecule (W936)    | Tyr188, Tyr181,<br>Phe227, Trp229        |
| ZINC_97995063    | Val106, Tyr181, Tyr188,<br>Phe227, Trp229 | Lys101 with O of NH<br>Lys101 with OH of N<br>Lys101 with NH of C=O     | Tyr188, Tyr181,<br>Phe227, Trp229        |

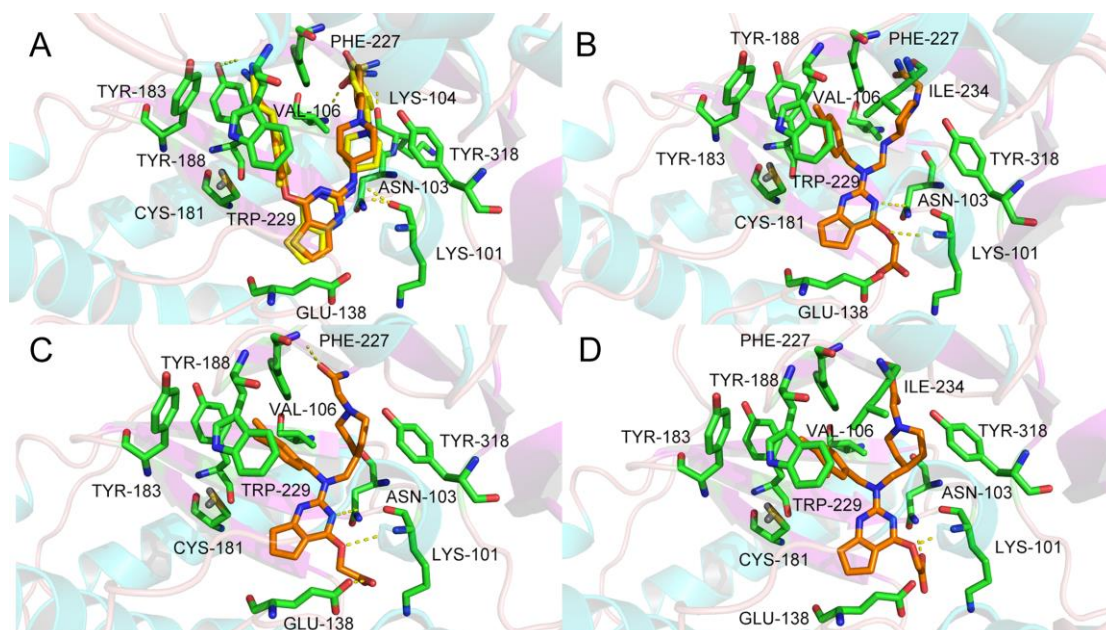

**Figure S1.** The docked results of compounds **25a**, **N1**, **N2**, and **N3** in the binding pocket of the mutant HIV-1 RT (PDB ID: 6C0R). (A) The re-docked co-crystallizing ligand (**25a**). The original and re-docked conformation were colored in yellow and orange, respectively. (B) The docking mode of compound **N1**. (C) The docking mode of compound **N2**. (D) The docking mode of compound **N3**.

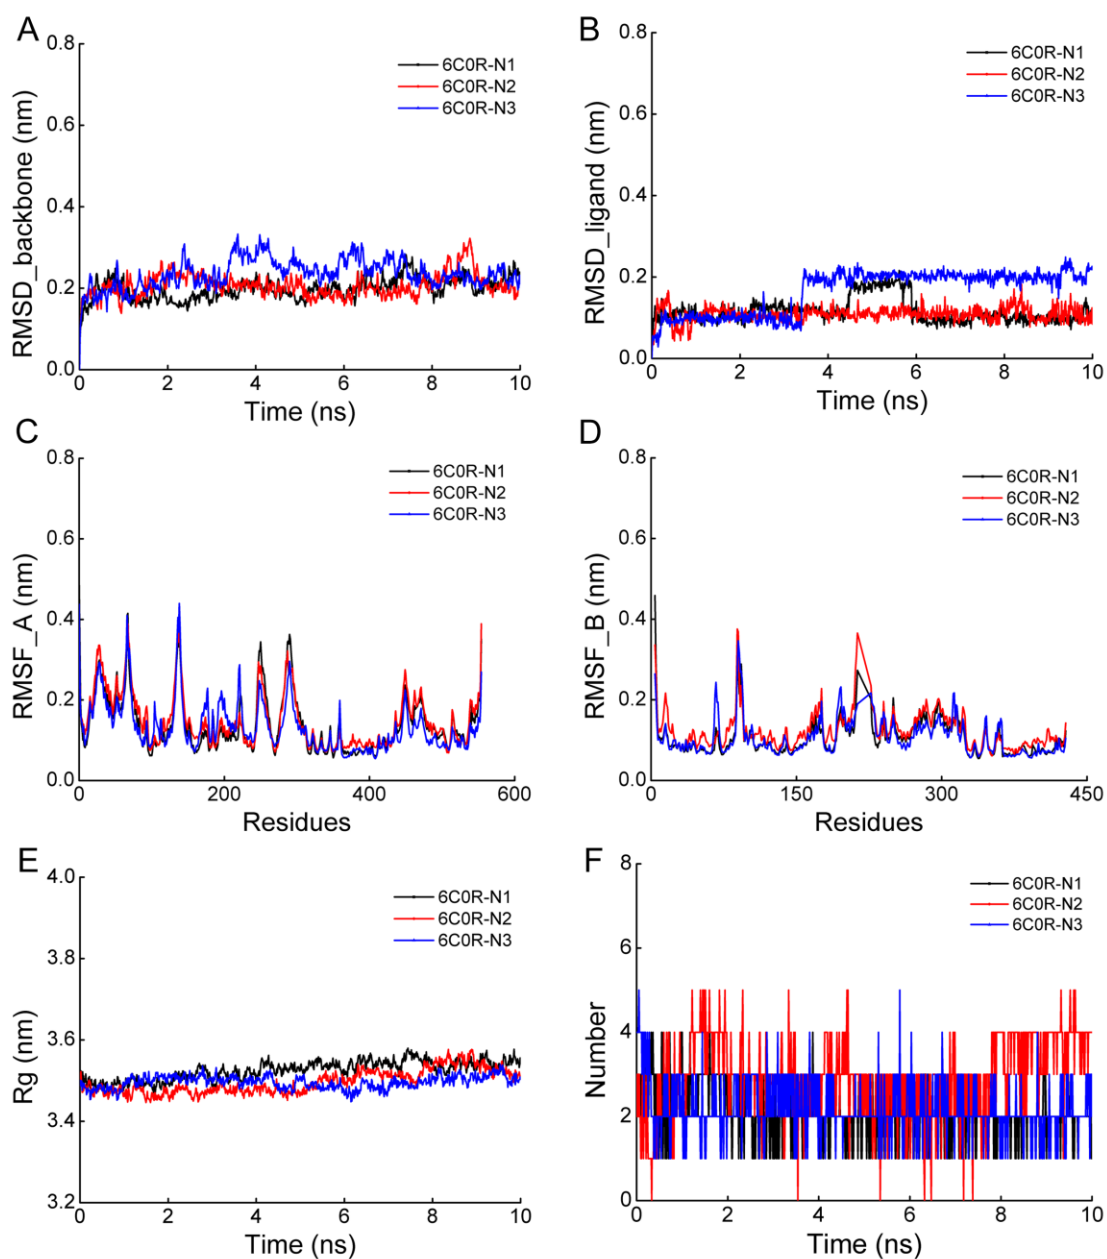

**Figure S2.** The 10 ns MD results of compounds **N1**, **N2**, and **N3** in the mutant HIV-1 RT (PDB ID: 6C0R). **(A)** RMSD values of backbone atoms of the protein. **(B)** RMSD values of the ligands. **(C)** RMSF values of the chain A. **(D)** RMSF values of the chain B. **(E)** Rg values of backbone atoms. **(F)** The total number of hydrogen bonds between the ligands and the protein.
